# Supplementary material for: Reverse-phase high performance liquid chromatography (RP-HPLC) as a powerful tool to characterise complex water-soluble copolymer architectures
Source: Royal Society of Chemistry journal article supplement (doi:10.1039/c8py00966j), 2018-01-01
Supplement: c8py00966j1.pdf [file c8py00966j1.pdf]

SUPPORTING INFORMATION

Characterization of complex architecture in water-soluble copolymers using  
RP-HPLC

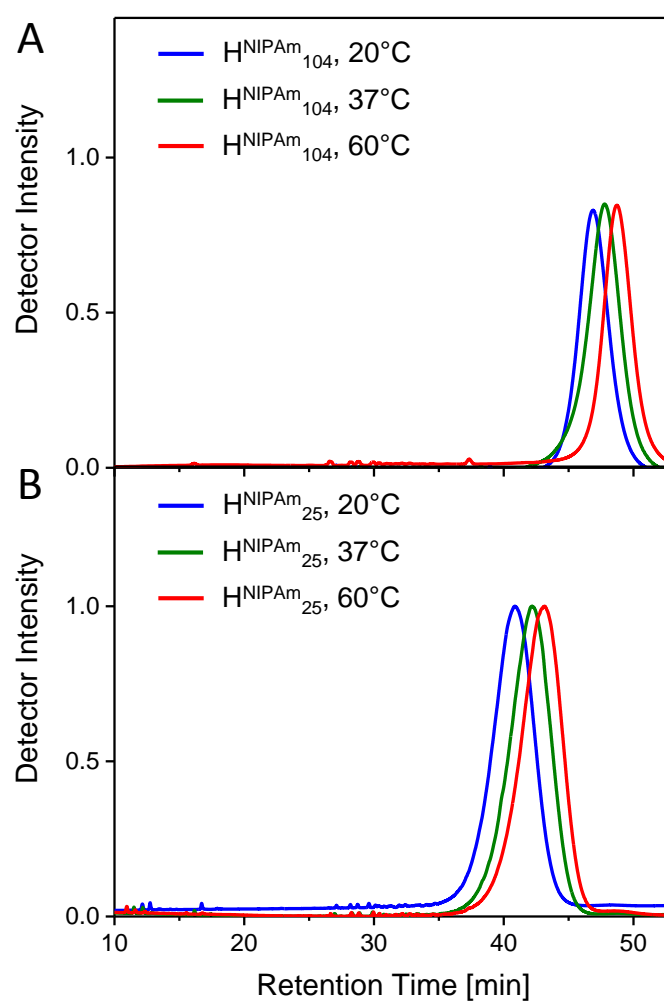

**Figure S1. Influence of temperature.** HPLC chromatographs of homopolymers of NIPAm A) DP = 100 or B) DP = 25 at various temperature. Solvent: water/ACN. Gradient: 1 to 95% ACN in 50 minutes. Column: C18 (4.6 mm × 150 mm)

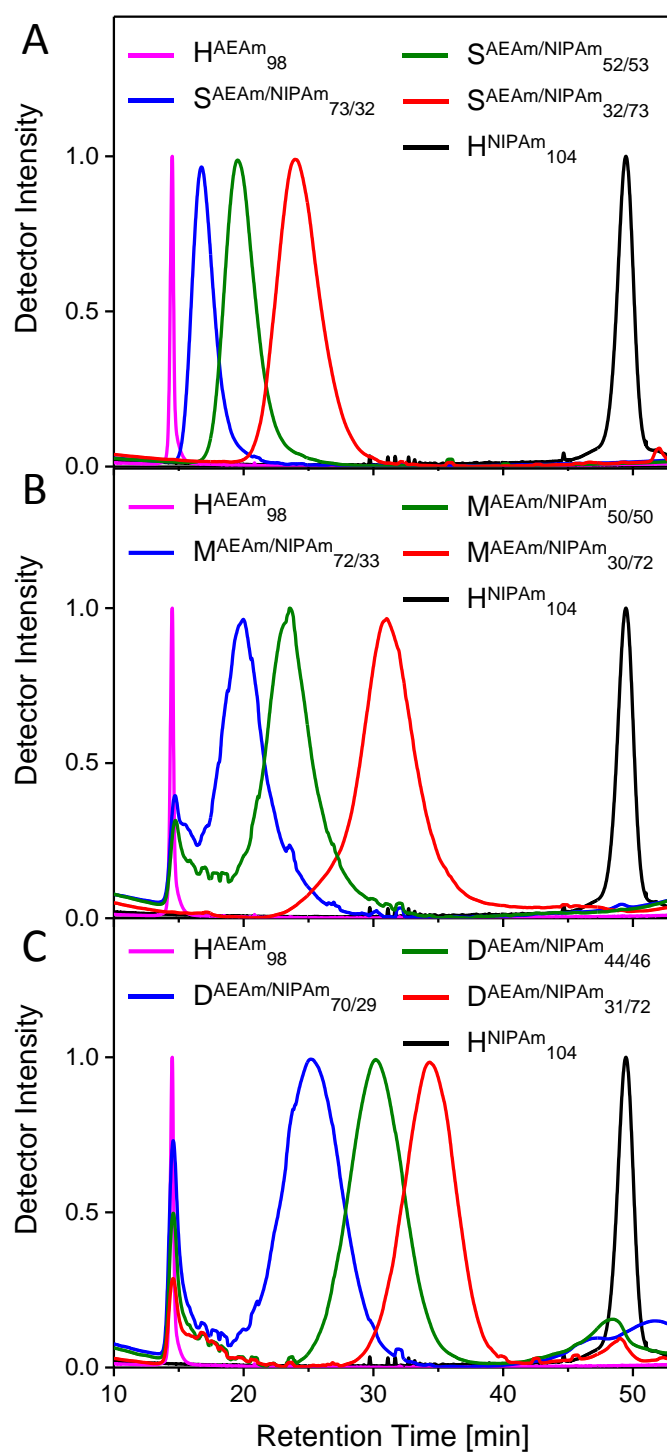

**Figure S2. Influence of copolymer composition.** HPLC chromatographs of copolymers with various AEm/NIPAm ratio for A) statistical, B) multiblock, C) diblock copolymers. Homopolymers are included for references. Solvent: water/ACN. Gradient: 1 to 95% ACN in 50 minutes at 37°C. Column: C18 (4.6 mm × 250 mm).

**Table S1.** Separation efficiency of copolymers AEAm/NIPAm within various composition using C18 column with a length of either 150mm or 250 mm.

| Segmentation                     | Sample         | 150 mm |                 | 250 mm |                 |
|----------------------------------|----------------|--------|-----------------|--------|-----------------|
|                                  |                | %ACN   | $\Delta(\%ACN)$ | %ACN   | $\Delta(\%ACN)$ |
| <b>Statistical<br/>copolymer</b> | $S_{100}^A 30$ | 37     | 8<br>5          | 45     | 8<br>6          |
|                                  | $S_{100}^A 50$ | 29     |                 | 37     |                 |
|                                  | $S_{100}^A 70$ | 24     |                 | 31     |                 |
| <b>Multiblock<br/>copolymer</b>  | $M_{100}^A 30$ | 51     | 13<br>10        | 54     | 14<br>7         |
|                                  | $M_{100}^A 50$ | 38     |                 | 40     |                 |
|                                  | $M_{100}^A 70$ | 28     |                 | 33     |                 |
| <b>Diblock<br/>copolymer</b>     | $D_{100}^A 30$ | 56     | 7<br>7          | 61     | 9<br>10         |
|                                  | $D_{100}^A 50$ | 49     |                 | 52     |                 |
|                                  | $D_{100}^A 70$ | 42     |                 | 42     |                 |

**Table S2.** Separation efficiency of copolymers AEAm/NIPAm within various segmentation using C18 column with a length of either 150mm or 250 mm.

| % AEAm     | $\Delta(\%ACN)$               |        |        |
|------------|-------------------------------|--------|--------|
|            | Sample                        | 150 mm | 250 mm |
| <b>30%</b> | $D_{100}^A 30 - M_{100}^A 30$ | 5      | 7      |
|            | $M_{100}^A 30 - S_{100}^A 30$ | 14     | 9      |
| <b>50%</b> | $D_{100}^A 50 - M_{100}^A 50$ | 11     | 12     |
|            | $M_{100}^A 50 - S_{100}^A 50$ | 9      | 3      |
| <b>70%</b> | $D_{100}^A 70 - M_{100}^A 70$ | 14     | 10     |
|            | $M_{100}^A 70 - S_{100}^A 70$ | 4      | 1      |

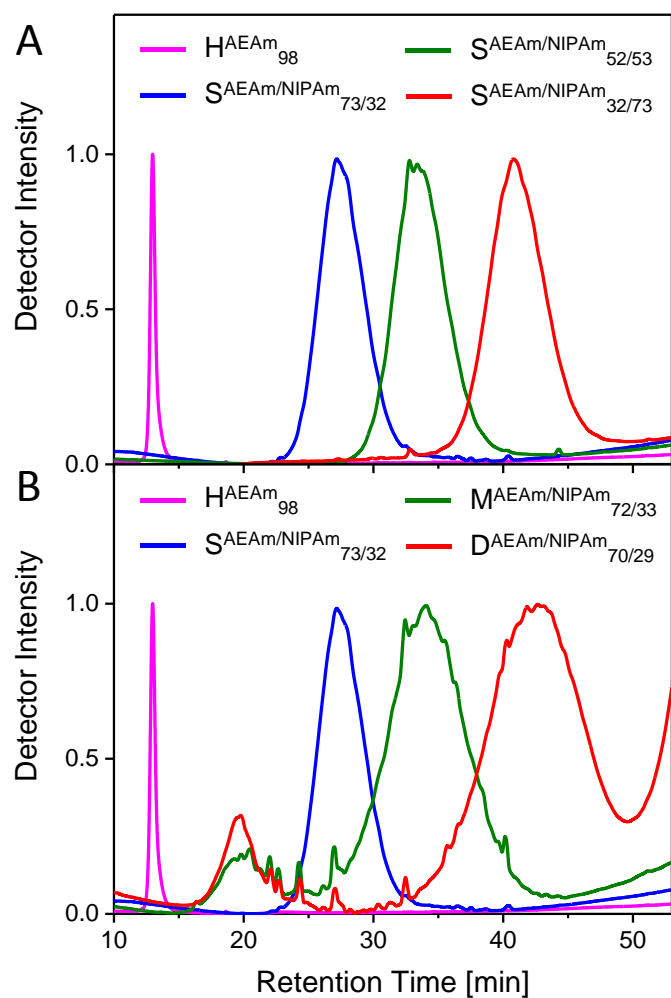

**Figure S3. Influence of solvent.** HPLC chromatographs of copolymers of AEm/NIPAm (DP = 100) with A) various composition or B) various architecture. Homopolymer  $H^A_{100}$  included for reference. Solvent: water/MeOH. Gradient: 1 to 95% MeOH in 50 minutes at 37°C. Column: C18 (4.6 mm  $\times$  150 mm)

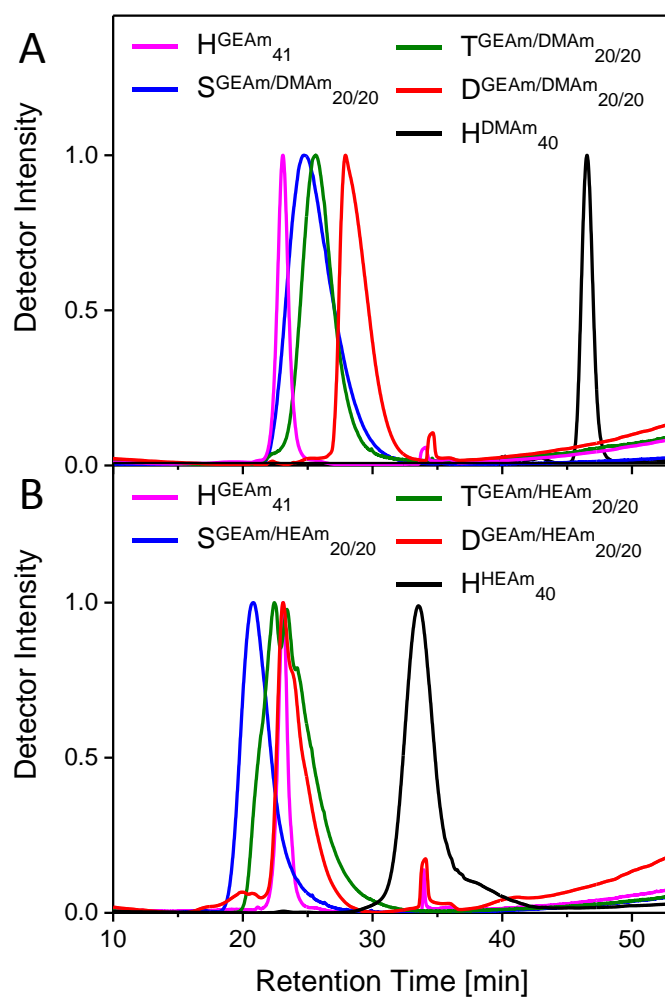

**Figure S4. Influence of copolymer architecture.** HPLC chromatographs of copolymers with various architecture for copolymers (DP = 40) of A) GEAm/DMAm copolymers, B) GEAm/HEAm. Homopolymers are included for references. Solvent: water/MeOH. Gradient: 5 to 90% MeOH in 50 minutes at 37°C. Column: C18 (4.6 mm × 250 mm).

**Table S3.** Repeated elution characteristics of poly(HEAm-*co*-GEAm)<sub>40</sub> and respective homopolymers. Solvent: water/ACN. Gradient: 1 to 50% ACN in 50 minutes at 37°C. Column: C18 (4.6 mm × 250 mm).

|                             | poly(HEAm) <sub>40</sub> | poly(GEAm) <sub>40</sub> | 50% diblock | 50% multiblock | 50% statistical |
|-----------------------------|--------------------------|--------------------------|-------------|----------------|-----------------|
| <b>rt<sub>1</sub> [min]</b> | 29.49                    | 23.64                    | 22.99       | 22.85          | 21.70           |
| <b>rt<sub>2</sub> [min]</b> | 29.62                    | 23.55                    | 23.40       | 23.06          | 21.72           |
| <b>rt<sub>3</sub> [min]</b> | 29.92                    | 23.59                    | 23.35       | 23.09          | 21.74           |
| <b>mean</b>                 | 29.68                    | 23.59                    | 23.25       | 23.00          | 21.72           |
| <b>SD</b>                   | 0.22                     | 0.04                     | 0.23        | 0.13           | 0.02            |

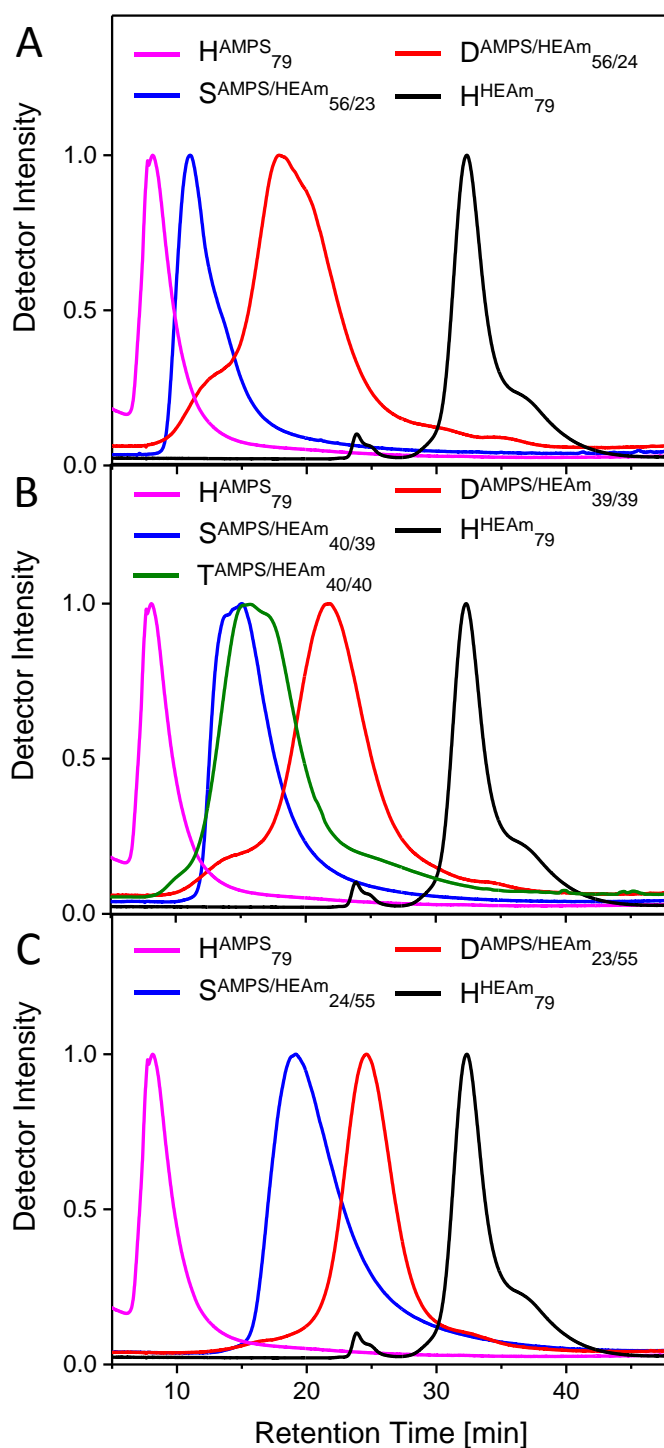

**Figure S5. Influence of copolymer architecture.** HPLC chromatographs of copolymers (DP = 80) with various architecture for a ratio of AMPSm/HEAm of A) 56/24, B) 40/40, C) 24/56. Homopolymers are included for references. Solvent: water/MeOH. Gradient: 10 to 80% MeOH in 50 minutes at 37°C. Column: C18 (4.6 mm × 250 mm).

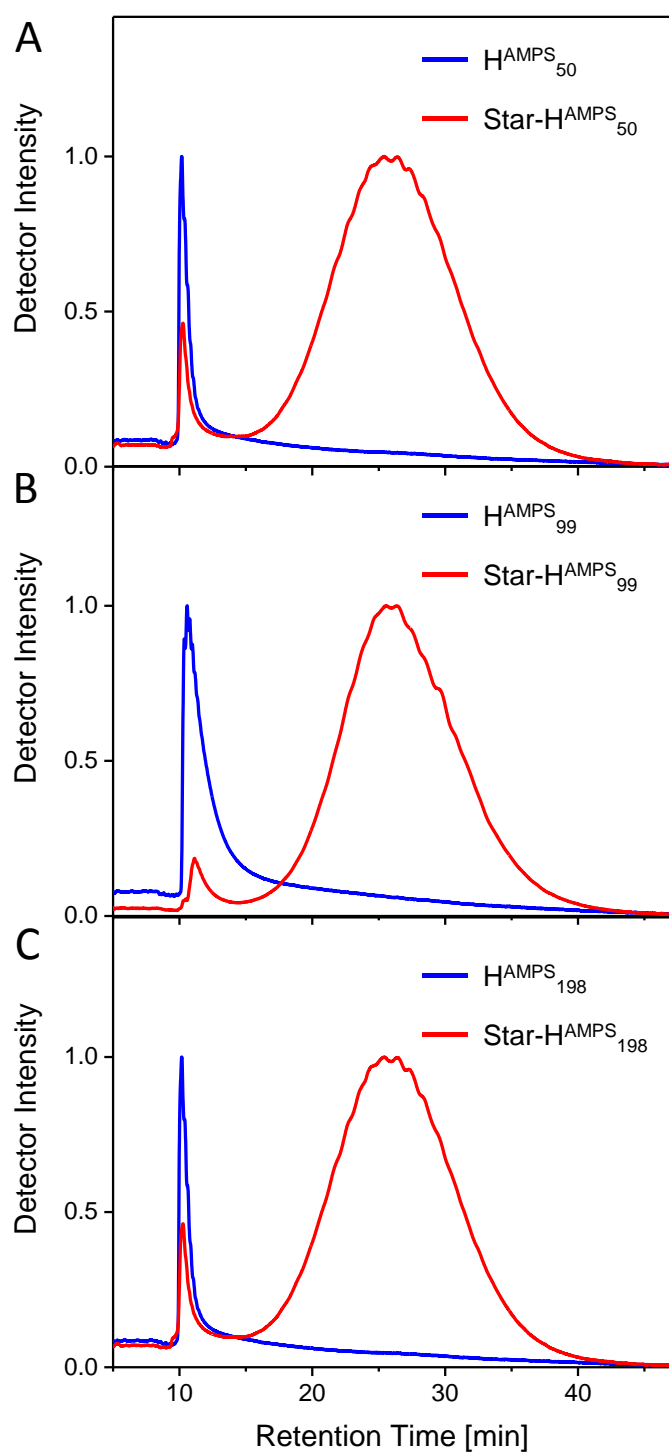

**Figure S6. Homopolymer versus star-shaped homopolymers.** Comparison of HPLC chromatographs of homopolymer and associated star-shaped homopolymer of a)  $H^{S}_{50}$ , b)  $H^{S}_{100}$ , c)  $H^{S}_{200}$ . Solvent: water/ACN. Gradient: 1 to 50% ACN in 50 minutes at 37°C. Column: C18 (4.6 mm  $\times$  250 mm).



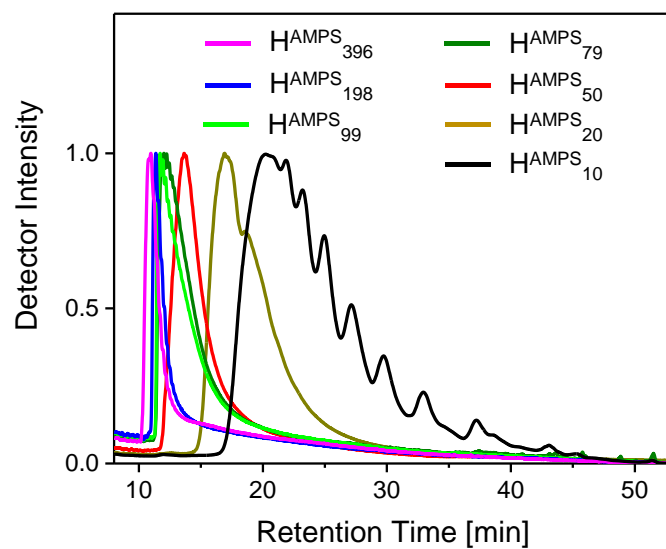

**Figure S7. Influence of molecular weight.** HPLC chromatographs of homopolymers of AMPSm with various DPs. Solvent: water/ACN. Gradient: 1 to 35% ACN in 50 minutes at 37°C. Column: C18 (4.6 mm × 250 mm).
